# Supplementary material for: In Peripheral Blood Mononuclear Cells Helicobacter pylori Induces the Secretion of Soluble and Exosomal Cytokines Related to Carcinogenesis
Source: MDPI journal article supplement (doi:10.3390/ijms23158801), 2022-08-08
Supplement: s1 [file s1]

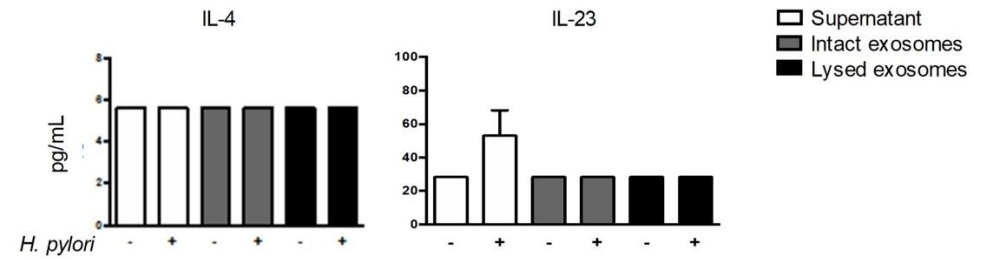

**Figure S1.** Cytokines secreted by Control-PBMCs and *H. pylori*-PBMCs in supernatant, and in intact or lysed exosomes. The concentration of IL-4 and IL-23 was determined in supernatant, intact exosomes and lysed exosomes secreted by Control-PBMCs or *H. pylori*-PBMCs. The graph represents the mean  $\pm$  SEM of three independent experiments. Data were analyzed using the Mann-Whitney U test and differences were considered statistically significant when \*  $p < 0.05$ .
