# Supplementary material for: In Peripheral Blood Mononuclear Cells Helicobacter pylori Induces the Secretion of Soluble and Exosomal Cytokines Related to Carcinogenesis
Source: MDPI journal article supplement (doi:10.3390/ijms23158801), 2022-08-08
Supplement: s1 [file s1]

Table S1. *H. pylori* promotes the secretion of exosomal and soluble cytokines associated with in-flammation and gastric

| Cytokine                       | Supernatant<br>Control<br>(pg/mL) | Supernatant<br><i>H. pylori</i><br>(pg/mL) | Intact<br>exosomes<br>Control<br>(pg/mL) | Intact<br>exosomes<br><i>H. pylori</i><br>(pg/mL) | Lysed<br>exosomes<br>Control<br>(pg/mL) | Lysed<br>exosomes<br><i>H. pylori</i><br>(pg/mL) |
|--------------------------------|-----------------------------------|--------------------------------------------|------------------------------------------|---------------------------------------------------|-----------------------------------------|--------------------------------------------------|
| <b>IL-1<math>\beta</math></b>  | 2.680 $\pm$ 1                     | 107.180 $\pm$ 29                           | 0.433 $\pm$ 0.142                        | 5.070 $\pm$ 0.366                                 | 33.363 $\pm$ 26.2                       | 24.297 $\pm$ 11                                  |
| <b>IL-6</b>                    | 234.170 $\pm$ 90.2                | 26063.553 $\pm$ 157                        | 2.540 $\pm$ 0.482                        | 8.473 $\pm$ 1.26                                  | 694.967 $\pm$ 667                       | 564.560 $\pm$ 443                                |
| <b>TNF-<math>\alpha</math></b> | 1.863 $\pm$ 0.468                 | 950.403 $\pm$ 212                          | 1.367 $\pm$ 0.284                        | 11.950 $\pm$ 0.758                                | 197.437 $\pm$ 160                       | 163.230 $\pm$ 70.6                               |
| <b>IFN-<math>\gamma</math></b> | 5.763 $\pm$ 4.7                   | 101.603 $\pm$ 12                           | 10.893 $\pm$ 0.828                       | 2.880 $\pm$ 1.46                                  | 376.733 $\pm$ 366                       | 255.147 $\pm$ 226                                |
| <b>IL-4</b>                    | 5.620 $\pm$ 0                     | 5.620 $\pm$ 0                              | 5.620 $\pm$ 0                            | 5.620 $\pm$ 0                                     | 5.620 $\pm$ 0                           | 5.620 $\pm$ 0                                    |
| <b>IL-10</b>                   | 1.960 $\pm$ 0                     | 68.847 $\pm$ 11.8                          | 1.720 $\pm$ 0.24                         | 7.543 $\pm$ 2.79                                  | 24.550 $\pm$ 12.9                       | 14.130 $\pm$ 9.83                                |
| <b>IL-31</b>                   | 28.043 $\pm$ 18.4                 | 71.857 $\pm$ 9.17                          | 18.877 $\pm$ 3.29                        | 3.380 $\pm$ 0                                     | 106.187 $\pm$ 36.9                      | 31.043 $\pm$ 24.3                                |
| <b>IL-33</b>                   | 5.000 $\pm$ 0                     | 1.950 $\pm$ 0.504                          | 5.000 $\pm$ 0                            | 5.000 $\pm$ 0                                     | 3.713 $\pm$ 1.29                        | 5.000 $\pm$ 0                                    |
| <b>IL-17A</b>                  | 1.837 $\pm$ 0.686                 | 27.460 $\pm$ 3.31                          | 1.287 $\pm$ 0.0767                       | 3.260 $\pm$ 0.967                                 | 20.473 $\pm$ 17.5                       | 19.277 $\pm$ 14.9                                |
| <b>IL-17F</b>                  | 1.840 $\pm$ 0                     | 38.980 $\pm$ 7.64                          | 4.643 $\pm$ 2.8                          | 1.840 $\pm$ 0                                     | 7.430 $\pm$ 5.59                        | 3.677 $\pm$ 1.84                                 |
| <b>IL-21</b>                   | 53.977 $\pm$ 28.4                 | 191.770 $\pm$ 35.3                         | 6.810 $\pm$ 0                            | 27.290 $\pm$ 6.7                                  | 69.080 $\pm$ 16.4                       | 90.407 $\pm$ 46.7                                |
| <b>IL-22</b>                   | 4.623 $\pm$ 0.243                 | 25.220 $\pm$ 2                             | 5.190 $\pm$ 0.651                        | 6.947 $\pm$ 0.42                                  | 23.593 $\pm$ 18.3                       | 19.180 $\pm$ 7.59                                |
| <b>IL-23</b>                   | 28.350 $\pm$ 0                    | 53.093 $\pm$ 15.2                          | 28.350 $\pm$ 0                           | 28.350 $\pm$ 0                                    | 28.350 $\pm$ 0                          | 28.350 $\pm$ 0                                   |
| <b>IL-25</b>                   | 0.940 $\pm$ 0.06                  | 6.093 $\pm$ 1.29                           | 0.940 $\pm$ 0.06                         | 0.920 $\pm$ 0.08                                  | 2.303 $\pm$ 1.23                        | 1.383 $\pm$ 0.573                                |
